# Supplementary material for: Urban green infrastructure does not show synergies or trade-offs in ecosystem services and invertebrate species richness
Source: Research Square preprint supplement (doi:10.21203/rs.3.rs-5841194/v1), 2025-06-23
Supplement: Supplementary file 3 [file 89ae727af5898c789f317f7b.xlsx]

## Sheet: modelPerformanceWater
ANOVA comparing AIC between model types
	degress of freedom	sum sq	mean sq	F value	p-value
modeltype	3	60.7	20.23	0.0226	0.9953
Residuals	28	25082.9	895.82
row	ES	modeltype	scale	modelPerformance	AIC	predictor	VI	estimate	error	pvalue	sign
1	waterinfil	none	1	0.08	2042.83	(Intercept)	0.0204167	464.747	233.911	0.000109894	Yes
2	waterinfil	none	1	0.08	2042.83	bulkDensity	0.0266556	-205.056	148.102	0.00633568	Yes
3	waterinfil	none	1	0.08	2042.83	soilMoisture	0.0610637	-796.806	424.173	0.000246189	Yes
4	waterinfil	none	1	0.08	2042.83	CUGICsimple1	0.00133266	-16.3776	61.816	0.596984	No
5	waterinfil	none	1	0.08	2042.83	ndviMaxScaled1	0.00721367	90.9309	154.424	0.240803	No
6	waterinfil	none	1	0.08	2042.83	LULC12	0.0204167	61.6232	94.6099	0.194694	No
7	waterinfil	none	1	0.08	2042.83	LULC13	0.0204167	26.7047	69.9746	0.44651	No
8	waterinfil	none	1	0.08	2042.83	LULC14	0.0204167	0.388057	81.4118	0.992406	No
9	waterinfil	all	1	0.07	2046.18	(Intercept)	0.0196436	470.286	243.437	0.000167003	Yes
10	waterinfil	all	1	0.07	2046.18	bulkDensity	0.0231004	-201.237	159.663	0.012777	Yes
11	waterinfil	all	1	0.07	2046.18	soilMoisture	0.0639231	-824.337	434.715	0.000217191	Yes
12	waterinfil	all	1	0.07	2046.18	soilMoisture	0.0028661	-824.337	434.715	0.000217191	Yes
13	waterinfil	all	1	0.07	2046.18	soilMoisture	0.00461087	-824.337	434.715	0.000217191	Yes
14	waterinfil	all	1	0.07	2046.18	PCoA1soil_OTU	0.0028661	14.7258	198.061	0.881994	No
15	waterinfil	all	1	0.07	2046.18	PCoA1soil_OTU	0.00461087	14.7258	198.061	0.881994	No
16	waterinfil	all	1	0.07	2046.18	PCoA2soil_OTU	0.0028661	-92.8921	247.869	0.454738	No
17	waterinfil	all	1	0.07	2046.18	PCoA2soil_OTU	0.00461087	-92.8921	247.869	0.454738	No
18	waterinfil	all	1	0.07	2046.18	CUGICsimple1	0.00112782	-14.3979	62.5215	0.645784	No
19	waterinfil	all	1	0.07	2046.18	ndviMaxScaled1	0.00508625	68.5908	166.547	0.411455	No
20	waterinfil	all	1	0.07	2046.18	LULC12	0.0196436	63.8138	96.4752	0.187921	No
21	waterinfil	all	1	0.07	2046.18	LULC13	0.0196436	26.0758	70.4182	0.460117	No
22	waterinfil	all	1	0.07	2046.18	LULC14	0.0196436	0.263216	81.9571	0.994884	No
23	waterinfil	invert	1	0.07	2045.05	(Intercept)	0.0204215	482.268	236.495	7.40208e-05	Yes
24	waterinfil	invert	1	0.07	2045.05	bulkDensity	0.0263278	-213.729	153.625	0.00610286	Yes
25	waterinfil	invert	1	0.07	2045.05	soilMoisture	0.0641566	-823.055	427.91	0.000177783	Yes
26	waterinfil	invert	1	0.07	2045.05	soilMoisture	0.00257755	-823.055	427.91	0.000177783	Yes
27	waterinfil	invert	1	0.07	2045.05	soilMoisture	0.00637569	-823.055	427.91	0.000177783	Yes
28	waterinfil	invert	1	0.07	2045.05	PCoA1soil_OTU_invert	0.00257755	-29.1514	226.672	0.797374	No
29	waterinfil	invert	1	0.07	2045.05	PCoA1soil_OTU_invert	0.00637569	-29.1514	226.672	0.797374	No
30	waterinfil	invert	1	0.07	2045.05	PCoA2soil_OTU_invert	0.00257755	135.446	213.228	0.205939	No
31	waterinfil	invert	1	0.07	2045.05	PCoA2soil_OTU_invert	0.00637569	135.446	213.228	0.205939	No
32	waterinfil	invert	1	0.07	2045.05	CUGICsimple1	0.00140816	-17.186	61.9232	0.579687	No
33	waterinfil	invert	1	0.07	2045.05	ndviMaxScaled1	0.00535548	73.9093	163.27	0.366753	No
34	waterinfil	invert	1	0.07	2045.05	LULC12	0.0204215	65.594	95.4675	0.171482	No
35	waterinfil	invert	1	0.07	2045.05	LULC13	0.0204215	29.1977	70.1648	0.406612	No
36	waterinfil	invert	1	0.07	2045.05	LULC14	0.0204215	5.27971	81.8701	0.897551	No
37	waterinfil	burrow	1	0.07	2046.38	(Intercept)	0.0208086	469.941	236.843	0.00011277	Yes
38	waterinfil	burrow	1	0.07	2046.38	bulkDensity	0.0270181	-216.391	154.53	0.00578656	Yes
39	waterinfil	burrow	1	0.07	2046.38	soilMoisture	0.060501	-787.057	427.623	0.000325426	Yes
40	waterinfil	burrow	1	0.07	2046.38	soilMoisture	0.00118465	-787.057	427.623	0.000325426	Yes
41	waterinfil	burrow	1	0.07	2046.38	soilMoisture	0.000697458	-787.057	427.623	0.000325426	Yes
42	waterinfil	burrow	1	0.07	2046.38	PCoA1soil_OTU_burrow	0.00118465	51.0278	180.895	0.573498	No
43	waterinfil	burrow	1	0.07	2046.38	PCoA1soil_OTU_burrow	0.000697458	51.0278	180.895	0.573498	No
44	waterinfil	burrow	1	0.07	2046.38	PCoA2soil_OTU_burrow	0.00118465	36.6082	198.318	0.71252	No
45	waterinfil	burrow	1	0.07	2046.38	PCoA2soil_OTU_burrow	0.000697458	36.6082	198.318	0.71252	No
46	waterinfil	burrow	1	0.07	2046.38	CUGICsimple1	0.00123663	-15.4014	62.435	0.622497	No
47	waterinfil	burrow	1	0.07	2046.38	ndviMaxScaled1	0.00776421	102.988	159.699	0.199153	No
48	waterinfil	burrow	1	0.07	2046.38	LULC12	0.0208086	65.0774	95.7097	0.175946	No
49	waterinfil	burrow	1	0.07	2046.38	LULC13	0.0208086	24.7257	71.4605	0.490023	No
50	waterinfil	burrow	1	0.07	2046.38	LULC14	0.0208086	0.0274704	82.0139	0.999466	No
51	waterinfil	none	2	0.06	2080.76	(Intercept)	0.0190864	480.759	252.576	0.000203652	Yes
52	waterinfil	none	2	0.06	2080.76	bulkDensity	0.0267434	-205.378	148.023	0.00621443	Yes
53	waterinfil	none	2	0.06	2080.76	soilMoisture	0.0565405	-766.749	425.655	0.000426081	Yes
54	waterinfil	none	2	0.06	2080.76	CUGICsimple2	0.000507983	-15.9678	75.7676	0.67399	No
55	waterinfil	none	2	0.06	2080.76	ndviMaxScaled2	0.002832	55.4486	165.626	0.504153	No
56	waterinfil	none	2	0.06	2080.76	LULC22	0.0190864	55.0889	93.0837	0.238403	No
57	waterinfil	none	2	0.06	2080.76	LULC23	0.0190864	10.166	71.9708	0.777941	No
58	waterinfil	none	2	0.06	2080.76	LULC24	0.0190864	2.54235	87.4858	0.953729	No
59	waterinfil	all	2	0.06	2083.77	(Intercept)	0.0183655	488.482	262.362	0.000277212	Yes
60	waterinfil	all	2	0.06	2083.77	bulkDensity	0.0228034	-198.105	159.322	0.0139831	Yes
61	waterinfil	all	2	0.06	2083.77	soilMoisture	0.0594262	-793.013	434.753	0.000363923	Yes
62	waterinfil	all	2	0.06	2083.77	soilMoisture	0.00299775	-793.013	434.753	0.000363923	Yes
63	waterinfil	all	2	0.06	2083.77	soilMoisture	0.00553245	-793.013	434.753	0.000363923	Yes
64	waterinfil	all	2	0.06	2083.77	PCoA1soil_OTU	0.00299775	8.70723	196.315	0.929433	No
65	waterinfil	all	2	0.06	2083.77	PCoA1soil_OTU	0.00553245	8.70723	196.315	0.929433	No
66	waterinfil	all	2	0.06	2083.77	PCoA2soil_OTU	0.00299775	-117.292	247.032	0.343838	No
67	waterinfil	all	2	0.06	2083.77	PCoA2soil_OTU	0.00553245	-117.292	247.032	0.343838	No
68	waterinfil	all	2	0.06	2083.77	CUGICsimple2	0.000481979	-15.6934	76.2364	0.681145	No
69	waterinfil	all	2	0.06	2083.77	ndviMaxScaled2	0.00163307	24.2178	178.94	0.787008	No
70	waterinfil	all	2	0.06	2083.77	LULC22	0.0183655	57.6826	94.3897	0.223541	No
71	waterinfil	all	2	0.06	2083.77	LULC23	0.0183655	8.98503	72.3479	0.804177	No
72	waterinfil	all	2	0.06	2083.77	LULC24	0.0183655	3.46258	87.8423	0.937268	No
73	waterinfil	invert	2	0.06	2082.63	(Intercept)	0.0193644	501.778	254.84	0.000125469	Yes
74	waterinfil	invert	2	0.06	2082.63	bulkDensity	0.0264724	-213.695	153.35	0.00600777	Yes
75	waterinfil	invert	2	0.06	2082.63	soilMoisture	0.0594889	-791.38	427.582	0.00030026	Yes
76	waterinfil	invert	2	0.06	2082.63	soilMoisture	0.00248564	-791.38	427.582	0.00030026	Yes
77	waterinfil	invert	2	0.06	2082.63	soilMoisture	0.0074257	-791.38	427.582	0.00030026	Yes
78	waterinfil	invert	2	0.06	2082.63	PCoA1soil_OTU_invert	0.00248564	-36.3211	226.229	0.748582	No
79	waterinfil	invert	2	0.06	2082.63	PCoA1soil_OTU_invert	0.0074257	-36.3211	226.229	0.748582	No
80	waterinfil	invert	2	0.06	2082.63	PCoA2soil_OTU_invert	0.00248564	146.604	211.018	0.166742	No
81	waterinfil	invert	2	0.06	2082.63	PCoA2soil_OTU_invert	0.0074257	146.604	211.018	0.166742	No
82	waterinfil	invert	2	0.06	2082.63	CUGICsimple2	0.000610444	-17.7433	75.8069	0.64038	No
83	waterinfil	invert	2	0.06	2082.63	ndviMaxScaled2	0.00167993	31.7394	176.558	0.7197	No
84	waterinfil	invert	2	0.06	2082.63	LULC22	0.0193644	60.4145	93.7219	0.199303	No
85	waterinfil	invert	2	0.06	2082.63	LULC23	0.0193644	12.508	72.051	0.728929	No
86	waterinfil	invert	2	0.06	2082.63	LULC24	0.0193644	7.90202	87.8973	0.857551	No
87	waterinfil	burrow	2	0.06	2084.24	(Intercept)	0.0196301	485.444	255.203	0.000206466	Yes
88	waterinfil	burrow	2	0.06	2084.24	bulkDensity	0.0273108	-217.484	154.364	0.00548728	Yes
89	waterinfil	burrow	2	0.06	2084.24	soilMoisture	0.056159	-759.967	428.418	0.000518889	Yes
90	waterinfil	burrow	2	0.06	2084.24	soilMoisture	0.00115832	-759.967	428.418	0.000518889	Yes
91	waterinfil	burrow	2	0.06	2084.24	soilMoisture	0.000719374	-759.967	428.418	0.000518889	Yes
92	waterinfil	burrow	2	0.06	2084.24	PCoA1soil_OTU_burrow	0.00115832	53.8714	178.833	0.547767	No
93	waterinfil	burrow	2	0.06	2084.24	PCoA1soil_OTU_burrow	0.000719374	53.8714	178.833	0.547767	No
94	waterinfil	burrow	2	0.06	2084.24	PCoA2soil_OTU_burrow	0.00115832	41.3241	196.977	0.675391	No
95	waterinfil	burrow	2	0.06	2084.24	PCoA2soil_OTU_burrow	0.000719374	41.3241	196.977	0.675391	No
96	waterinfil	burrow	2	0.06	2084.24	CUGICsimple2	0.000461045	-14.8101	76.3196	0.698486	No
97	waterinfil	burrow	2	0.06	2084.24	ndviMaxScaled2	0.00319079	71.033	172.377	0.411158	No
98	waterinfil	burrow	2	0.06	2084.24	LULC22	0.0196301	58.2573	93.985	0.217017	No
99	waterinfil	burrow	2	0.06	2084.24	LULC23	0.0196301	8.46418	73.1593	0.817327	No
100	waterinfil	burrow	2	0.06	2084.24	LULC24	0.0196301	2.83016	88.0519	0.94883	No
101	waterinfil	none	3	0.06	2117.65	(Intercept)	0.0153299	462.828	254.178	0.000368635	Yes
102	waterinfil	none	3	0.06	2117.65	bulkDensity	0.0268358	-206.25	146.506	0.00550165	Yes
103	waterinfil	none	3	0.06	2117.65	soilMoisture	0.0571013	-774.664	418.024	0.000292211	Yes
104	waterinfil	none	3	0.06	2117.65	CUGICsimple3	0.00015351	-10.118	80.1059	0.8009	No
105	waterinfil	none	3	0.06	2117.65	ndviMaxScaled3	0.00574614	76.3035	165.649	0.358342	No
106	waterinfil	none	3	0.06	2117.65	LULC32	0.0153299	49.1544	91.4029	0.283798	No
107	waterinfil	none	3	0.06	2117.65	LULC33	0.0153299	19.7247	70.6108	0.577182	No
108	waterinfil	none	3	0.06	2117.65	LULC34	0.0153299	2.33952	88.0088	0.957668	No
109	waterinfil	all	3	0.06	2120.84	(Intercept)	0.0145479	468.186	258.797	0.000402538	Yes
110	waterinfil	all	3	0.06	2120.84	bulkDensity	0.0234758	-203.012	157.207	0.0107393	Yes
111	waterinfil	all	3	0.06	2120.84	soilMoisture	0.0602201	-806.809	428.225	0.000234249	Yes
112	waterinfil	all	3	0.06	2120.84	soilMoisture	0.00244721	-806.809	428.225	0.000234249	Yes
113	waterinfil	all	3	0.06	2120.84	soilMoisture	0.00484058	-806.809	428.225	0.000234249	Yes
114	waterinfil	all	3	0.06	2120.84	PCoA1soil_OTU	0.00244721	20.9067	196.224	0.83154	No
115	waterinfil	all	3	0.06	2120.84	PCoA1soil_OTU	0.00484058	20.9067	196.224	0.83154	No
116	waterinfil	all	3	0.06	2120.84	PCoA2soil_OTU	0.00244721	-100.076	242.885	0.411189	No
117	waterinfil	all	3	0.06	2120.84	PCoA2soil_OTU	0.00484058	-100.076	242.885	0.411189	No
118	waterinfil	all	3	0.06	2120.84	CUGICsimple3	0.000104943	-7.14497	80.7593	0.859786	No
119	waterinfil	all	3	0.06	2120.84	ndviMaxScaled3	0.0040082	52.2415	177.755	0.557539	No
120	waterinfil	all	3	0.06	2120.84	LULC32	0.0145479	52.9141	93.7193	0.260579	No
121	waterinfil	all	3	0.06	2120.84	LULC33	0.0145479	19.402	71.4669	0.587943	No
122	waterinfil	all	3	0.06	2120.84	LULC34	0.0145479	4.10955	88.5482	0.926167	No
123	waterinfil	invert	3	0.06	2119.5	(Intercept)	0.0152359	475.052	255.963	0.000287546	Yes
124	waterinfil	invert	3	0.06	2119.5	bulkDensity	0.0266312	-214.497	151.633	0.00529326	Yes
125	waterinfil	invert	3	0.06	2119.5	soilMoisture	0.0603516	-804.767	421.202	0.000192631	Yes
126	waterinfil	invert	3	0.06	2119.5	soilMoisture	0.00236443	-804.767	421.202	0.000192631	Yes
127	waterinfil	invert	3	0.06	2119.5	soilMoisture	0.0080244	-804.767	421.202	0.000192631	Yes
128	waterinfil	invert	3	0.06	2119.5	PCoA1soil_OTU_invert	0.00236443	-32.1679	221.707	0.772069	No
129	waterinfil	invert	3	0.06	2119.5	PCoA1soil_OTU_invert	0.0080244	-32.1679	221.707	0.772069	No
130	waterinfil	invert	3	0.06	2119.5	PCoA2soil_OTU_invert	0.00236443	144.512	205.968	0.162569	No
131	waterinfil	invert	3	0.06	2119.5	PCoA2soil_OTU_invert	0.0080244	144.512	205.968	0.162569	No
132	waterinfil	invert	3	0.06	2119.5	CUGICsimple3	9.86302e-05	-5.60109	80.3851	0.889352	No
133	waterinfil	invert	3	0.06	2119.5	ndviMaxScaled3	0.00419125	56.287	173.146	0.516558	No
134	waterinfil	invert	3	0.06	2119.5	LULC32	0.0152359	51.6624	91.5932	0.26105	No
135	waterinfil	invert	3	0.06	2119.5	LULC33	0.0152359	21.3161	70.7844	0.547877	No
136	waterinfil	invert	3	0.06	2119.5	LULC34	0.0152359	5.51037	88.2278	0.900757	No
137	waterinfil	burrow	3	0.06	2121.2	(Intercept)	0.0155918	471.404	257.352	0.000342349	Yes
138	waterinfil	burrow	3	0.06	2121.2	bulkDensity	0.027597	-218.849	152.702	0.00473749	Yes
139	waterinfil	burrow	3	0.06	2121.2	soilMoisture	0.0565243	-766.602	421.448	0.000375136	Yes
140	waterinfil	burrow	3	0.06	2121.2	soilMoisture	0.00134667	-766.602	421.448	0.000375136	Yes
141	waterinfil	burrow	3	0.06	2121.2	soilMoisture	0.000313334	-766.602	421.448	0.000375136	Yes
142	waterinfil	burrow	3	0.06	2121.2	PCoA1soil_OTU_burrow	0.00134667	55.11	175.132	0.530057	No
143	waterinfil	burrow	3	0.06	2121.2	PCoA1soil_OTU_burrow	0.000313334	55.11	175.132	0.530057	No
144	waterinfil	burrow	3	0.06	2121.2	PCoA2soil_OTU_burrow	0.00134667	23.5735	192.086	0.806439	No
145	waterinfil	burrow	3	0.06	2121.2	PCoA2soil_OTU_burrow	0.000313334	23.5735	192.086	0.806439	No
146	waterinfil	burrow	3	0.06	2121.2	CUGICsimple3	0.000141874	-9.59503	80.5312	0.811972	No
147	waterinfil	burrow	3	0.06	2121.2	ndviMaxScaled3	0.00614979	86.4523	169.545	0.309426	No
148	waterinfil	burrow	3	0.06	2121.2	LULC32	0.0155918	51.0864	92.3136	0.270118	No
149	waterinfil	burrow	3	0.06	2121.2	LULC33	0.0155918	17.7336	71.5433	0.620786	No
150	waterinfil	burrow	3	0.06	2121.2	LULC34	0.0155918	1.0338	88.6895	0.981431	No
151	waterinfil	none	4	0.06	2105.38	(Intercept)	0.0202662	521.452	243.787	3.29958e-05	Yes
152	waterinfil	none	4	0.06	2105.38	bulkDensity	0.0276571	-209.649	146.428	0.0047743	Yes
153	waterinfil	none	4	0.06	2105.38	soilMoisture	0.0549186	-750.101	421.608	0.000496541	Yes
154	waterinfil	none	4	0.06	2105.38	CUGICsimple4	0.00220161	-28.6043	87.8861	0.516055	No
155	waterinfil	none	4	0.06	2105.38	ndviMaxScaled4	0.000469721	8.0547	170.012	0.924633	No
156	waterinfil	none	4	0.06	2105.38	LULC42	0.0202662	61.055	93.9004	0.1954	No
157	waterinfil	none	4	0.06	2105.38	LULC43	0.0202662	7.42284	70.15	0.832677	No
158	waterinfil	none	4	0.06	2105.38	LULC44	0.0202662	-5.17376	88.1033	0.906658	No
159	waterinfil	all	4	0.06	2107.88	(Intercept)	0.0196236	522.338	249.402	4.73706e-05	Yes
160	waterinfil	all	4	0.06	2107.88	bulkDensity	0.0230499	-197.544	158.353	0.0136653	Yes
161	waterinfil	all	4	0.06	2107.88	soilMoisture	0.0585448	-787.091	431.479	0.000362171	Yes
162	waterinfil	all	4	0.06	2107.88	soilMoisture	0.00282927	-787.091	431.479	0.000362171	Yes
163	waterinfil	all	4	0.06	2107.88	soilMoisture	0.0066969	-787.091	431.479	0.000362171	Yes
164	waterinfil	all	4	0.06	2107.88	PCoA1soil_OTU	0.00282927	8.75644	195.665	0.928799	No
165	waterinfil	all	4	0.06	2107.88	PCoA1soil_OTU	0.0066969	8.75644	195.665	0.928799	No
166	waterinfil	all	4	0.06	2107.88	PCoA2soil_OTU	0.00282927	-140.145	240.017	0.244719	No
167	waterinfil	all	4	0.06	2107.88	PCoA2soil_OTU	0.0066969	-140.145	240.017	0.244719	No
168	waterinfil	all	4	0.06	2107.88	CUGICsimple4	0.00221595	-26.369	88.1757	0.550662	No
169	waterinfil	all	4	0.06	2107.88	ndviMaxScaled4	0.000784611	-24.1683	180.197	0.788876	No
170	waterinfil	all	4	0.06	2107.88	LULC42	0.0196236	64.8494	95.4044	0.176013	No
171	waterinfil	all	4	0.06	2107.88	LULC43	0.0196236	6.78827	70.5425	0.84764	No
172	waterinfil	all	4	0.06	2107.88	LULC44	0.0196236	-3.77979	88.3051	0.931891	No
173	waterinfil	invert	4	0.07	2106.74	(Intercept)	0.020244	526.284	244.185	2.9145e-05	Yes
174	waterinfil	invert	4	0.07	2106.74	bulkDensity	0.0266399	-212.948	152.046	0.00575546	Yes
175	waterinfil	invert	4	0.07	2106.74	soilMoisture	0.0588357	-788.877	424.402	0.000282241	Yes
176	waterinfil	invert	4	0.07	2106.74	soilMoisture	0.00338673	-788.877	424.402	0.000282241	Yes
177	waterinfil	invert	4	0.07	2106.74	soilMoisture	0.00828829	-788.877	424.402	0.000282241	Yes
178	waterinfil	invert	4	0.07	2106.74	PCoA1soil_OTU_invert	0.00338673	-62.1782	218.235	0.569635	No
179	waterinfil	invert	4	0.07	2106.74	PCoA1soil_OTU_invert	0.00828829	-62.1782	218.235	0.569635	No
180	waterinfil	invert	4	0.07	2106.74	PCoA2soil_OTU_invert	0.00338673	153.032	207.414	0.142115	No
181	waterinfil	invert	4	0.07	2106.74	PCoA2soil_OTU_invert	0.00828829	153.032	207.414	0.142115	No
182	waterinfil	invert	4	0.07	2106.74	CUGICsimple4	0.0020003	-23.6937	88.2607	0.592121	No
183	waterinfil	invert	4	0.07	2106.74	ndviMaxScaled4	0.000550185	-12.2285	174.513	0.888732	No
184	waterinfil	invert	4	0.07	2106.74	LULC42	0.020244	65.7938	94.3353	0.165083	No
185	waterinfil	invert	4	0.07	2106.74	LULC43	0.020244	12.9777	70.4148	0.712933	No
186	waterinfil	invert	4	0.07	2106.74	LULC44	0.020244	1.24786	88.3424	0.977499	No
187	waterinfil	burrow	4	0.05	2109.19	(Intercept)	0.0205487	525.246	245.96	3.41604e-05	Yes
188	waterinfil	burrow	4	0.05	2109.19	bulkDensity	0.0276587	-217.732	153.359	0.00513713	Yes
189	waterinfil	burrow	4	0.05	2109.19	soilMoisture	0.0546608	-744.002	425.533	0.000617561	Yes
190	waterinfil	burrow	4	0.05	2109.19	soilMoisture	0.000881196	-744.002	425.533	0.000617561	Yes
191	waterinfil	burrow	4	0.05	2109.19	soilMoisture	0.000252049	-744.002	425.533	0.000617561	Yes
192	waterinfil	burrow	4	0.05	2109.19	PCoA1soil_OTU_burrow	0.000881196	33.7049	175.828	0.701969	No
193	waterinfil	burrow	4	0.05	2109.19	PCoA1soil_OTU_burrow	0.000252049	33.7049	175.828	0.701969	No
194	waterinfil	burrow	4	0.05	2109.19	PCoA2soil_OTU_burrow	0.000881196	19.4067	194.105	0.841778	No
195	waterinfil	burrow	4	0.05	2109.19	PCoA2soil_OTU_burrow	0.000252049	19.4067	194.105	0.841778	No
196	waterinfil	burrow	4	0.05	2109.19	CUGICsimple4	0.00212265	-26.8465	89.2905	0.548517	No
197	waterinfil	burrow	4	0.05	2109.19	ndviMaxScaled4	0.000412172	13.426	173.037	0.876885	No
198	waterinfil	burrow	4	0.05	2109.19	LULC42	0.0205487	62.9402	94.9294	0.186815	No
199	waterinfil	burrow	4	0.05	2109.19	LULC43	0.0205487	6.05119	71.5991	0.865998	No
200	waterinfil	burrow	4	0.05	2109.19	LULC44	0.0205487	-5.43337	88.6452	0.902596	No
201	waterinfil	none	5	0.06	2118.24	(Intercept)	0.0190271	498.908	256.617	0.000149349	Yes
202	waterinfil	none	5	0.06	2118.24	bulkDensity	0.0285691	-211.908	145.654	0.00414978	Yes
203	waterinfil	none	5	0.06	2118.24	soilMoisture	0.0536778	-748.344	423.508	0.000539709	Yes
204	waterinfil	none	5	0.06	2118.24	CUGICsimple5	0.000208009	-13.7303	97.1026	0.777707	No
205	waterinfil	none	5	0.06	2118.24	ndviMaxScaled5	0.000491788	13.9181	172.714	0.872169	No
206	waterinfil	none	5	0.06	2118.24	LULC52	0.0190271	59.4896	93.0308	0.202836	No
207	waterinfil	none	5	0.06	2118.24	LULC53	0.0190271	9.64833	68.537	0.778663	No
208	waterinfil	none	5	0.06	2118.24	LULC54	0.0190271	-2.66147	95.2526	0.955507	No
209	waterinfil	all	5	0.06	2120.77	(Intercept)	0.0182405	501.491	261.24	0.000180177	Yes
210	waterinfil	all	5	0.06	2120.77	bulkDensity	0.024265	-203.34	156.89	0.0104624	Yes
211	waterinfil	all	5	0.06	2120.77	soilMoisture	0.0574901	-789.595	433.455	0.000368083	Yes
212	waterinfil	all	5	0.06	2120.77	soilMoisture	0.00260509	-789.595	433.455	0.000368083	Yes
213	waterinfil	all	5	0.06	2120.77	soilMoisture	0.00665394	-789.595	433.455	0.000368083	Yes
214	waterinfil	all	5	0.06	2120.77	PCoA1soil_OTU	0.00260509	16.3497	195.876	0.867638	No
215	waterinfil	all	5	0.06	2120.77	PCoA1soil_OTU	0.00665394	16.3497	195.876	0.867638	No
216	waterinfil	all	5	0.06	2120.77	PCoA2soil_OTU	0.00260509	-139.6	244.877	0.256001	No
217	waterinfil	all	5	0.06	2120.77	PCoA2soil_OTU	0.00665394	-139.6	244.877	0.256001	No
218	waterinfil	all	5	0.06	2120.77	CUGICsimple5	0.000146048	-9.02869	97.7062	0.85362	No
219	waterinfil	all	5	0.06	2120.77	ndviMaxScaled5	0.00059707	-22.235	185.141	0.810501	No
220	waterinfil	all	5	0.06	2120.77	LULC52	0.0182405	61.9615	94.9433	0.193774	No
221	waterinfil	all	5	0.06	2120.77	LULC53	0.0182405	10.2661	69.0833	0.76671	No
222	waterinfil	all	5	0.06	2120.77	LULC54	0.0182405	-3.99244	95.495	0.933471	No
223	waterinfil	invert	5	0.07	2119.48	(Intercept)	0.0188712	496.973	256.579	0.000158435	Yes
224	waterinfil	invert	5	0.07	2119.48	bulkDensity	0.0276001	-215.587	151.026	0.00490182	Yes
225	waterinfil	invert	5	0.07	2119.48	soilMoisture	0.0576895	-789.862	426.429	0.000295288	Yes
226	waterinfil	invert	5	0.07	2119.48	soilMoisture	0.00340165	-789.862	426.429	0.000295288	Yes
227	waterinfil	invert	5	0.07	2119.48	soilMoisture	0.00889891	-789.862	426.429	0.000295288	Yes
228	waterinfil	invert	5	0.07	2119.48	PCoA1soil_OTU_invert	0.00340165	-65.2869	224.802	0.562203	No
229	waterinfil	invert	5	0.07	2119.48	PCoA1soil_OTU_invert	0.00889891	-65.2869	224.802	0.562203	No
230	waterinfil	invert	5	0.07	2119.48	PCoA2soil_OTU_invert	0.00340165	159.568	209.036	0.128898	No
231	waterinfil	invert	5	0.07	2119.48	PCoA2soil_OTU_invert	0.00889891	159.568	209.036	0.128898	No
232	waterinfil	invert	5	0.07	2119.48	CUGICsimple5	9.54775e-05	-1.08281	98.3149	0.982455	No
233	waterinfil	invert	5	0.07	2119.48	ndviMaxScaled5	0.000460779	-14.5611	181.776	0.872928	No
234	waterinfil	invert	5	0.07	2119.48	LULC52	0.0188712	61.1475	93.1396	0.191139	No
235	waterinfil	invert	5	0.07	2119.48	LULC53	0.0188712	15.904	68.8584	0.644786	No
236	waterinfil	invert	5	0.07	2119.48	LULC54	0.0188712	0.148627	95.246	0.997514	No
237	waterinfil	burrow	5	0.05	2121.99	(Intercept)	0.0192608	503.852	258.998	0.000148703	Yes
238	waterinfil	burrow	5	0.05	2121.99	bulkDensity	0.0288542	-221.675	152.421	0.00417019	Yes
239	waterinfil	burrow	5	0.05	2121.99	soilMoisture	0.0533834	-742.254	427.315	0.000667031	Yes
240	waterinfil	burrow	5	0.05	2121.99	soilMoisture	0.000973902	-742.254	427.315	0.000667031	Yes
241	waterinfil	burrow	5	0.05	2121.99	soilMoisture	0.000208913	-742.254	427.315	0.000667031	Yes
242	waterinfil	burrow	5	0.05	2121.99	PCoA1soil_OTU_burrow	0.000973902	41.1497	177.354	0.643279	No
243	waterinfil	burrow	5	0.05	2121.99	PCoA1soil_OTU_burrow	0.000208913	41.1497	177.354	0.643279	No
244	waterinfil	burrow	5	0.05	2121.99	PCoA2soil_OTU_burrow	0.000973902	17.9189	196.576	0.855581	No
245	waterinfil	burrow	5	0.05	2121.99	PCoA2soil_OTU_burrow	0.000208913	17.9189	196.576	0.855581	No
246	waterinfil	burrow	5	0.05	2121.99	CUGICsimple5	0.000195348	-12.7885	99.1976	0.796878	No
247	waterinfil	burrow	5	0.05	2121.99	ndviMaxScaled5	0.000460485	23.5724	178.836	0.792427	No
248	waterinfil	burrow	5	0.05	2121.99	LULC52	0.0192608	61.2956	94.1609	0.194896	No
249	waterinfil	burrow	5	0.05	2121.99	LULC53	0.0192608	8.56305	69.5801	0.805908	No
250	waterinfil	burrow	5	0.05	2121.99	LULC54	0.0192608	-1.73963	95.9856	0.971132	No
251	waterinfil	none	10	0.07	2127.98	(Intercept)	0.027526	545.948	281.567	0.00015493	Yes
252	waterinfil	none	10	0.07	2127.98	bulkDensity	0.0305096	-218.991	143.718	0.00271074	Yes
253	waterinfil	none	10	0.07	2127.98	soilMoisture	0.0506174	-711.87	417.227	0.000820379	Yes
254	waterinfil	none	10	0.07	2127.98	CUGICsimple10	0.0010607	-8.10852	114.531	0.887583	No
255	waterinfil	none	10	0.07	2127.98	ndviMaxScaled10	0.00449015	-100.301	196.691	0.309363	No
256	waterinfil	none	10	0.07	2127.98	LULC102	0.027526	73.6146	89.2232	0.10093	No
257	waterinfil	none	10	0.07	2127.98	LULC103	0.027526	-11.4533	70.9009	0.747068	No
258	waterinfil	none	10	0.07	2127.98	LULC104	0.027526	-28.2518	123.758	0.648619	No
259	waterinfil	all	10	0.08	2129.54	(Intercept)	0.0267638	541.393	284.662	0.000205057	Yes
260	waterinfil	all	10	0.08	2129.54	bulkDensity	0.0258049	-208.581	153.9	0.00747854	Yes
261	waterinfil	all	10	0.08	2129.54	soilMoisture	0.0549759	-759.7	423.882	0.000452739	Yes
262	waterinfil	all	10	0.08	2129.54	soilMoisture	0.00254395	-759.7	423.882	0.000452739	Yes
263	waterinfil	all	10	0.08	2129.54	soilMoisture	0.00888734	-759.7	423.882	0.000452739	Yes
264	waterinfil	all	10	0.08	2129.54	PCoA1soil_OTU	0.00254395	24.224	193.863	0.802992	No
265	waterinfil	all	10	0.08	2129.54	PCoA1soil_OTU	0.00888734	24.224	193.863	0.802992	No
266	waterinfil	all	10	0.08	2129.54	PCoA2soil_OTU	0.00254395	-176.538	240.324	0.143828	No
267	waterinfil	all	10	0.08	2129.54	PCoA2soil_OTU	0.00888734	-176.538	240.324	0.143828	No
268	waterinfil	all	10	0.08	2129.54	CUGICsimple10	0.00107377	5.2441	115.983	0.928064	No
269	waterinfil	all	10	0.08	2129.54	ndviMaxScaled10	0.00721225	-151.175	208.13	0.148342	No
270	waterinfil	all	10	0.08	2129.54	LULC102	0.0267638	76.3459	90.7852	0.0946147	No
271	waterinfil	all	10	0.08	2129.54	LULC103	0.0267638	-12.2679	70.9446	0.729931	No
272	waterinfil	all	10	0.08	2129.54	LULC104	0.0267638	-28.3942	123.648	0.646685	No
273	waterinfil	invert	10	0.08	2128.43	(Intercept)	0.0272649	535.086	281.41	0.000205711	Yes
274	waterinfil	invert	10	0.08	2128.43	bulkDensity	0.029236	-220.774	148.401	0.00339894	Yes
275	waterinfil	invert	10	0.08	2128.43	soilMoisture	0.05446	-749.306	418.297	0.000455692	Yes
276	waterinfil	invert	10	0.08	2128.43	soilMoisture	0.00398991	-749.306	418.297	0.000455692	Yes
277	waterinfil	invert	10	0.08	2128.43	soilMoisture	0.0106858	-749.306	418.297	0.000455692	Yes
278	waterinfil	invert	10	0.08	2128.43	PCoA1soil_OTU_invert	0.00398991	-69.8202	219.023	0.524707	No
279	waterinfil	invert	10	0.08	2128.43	PCoA1soil_OTU_invert	0.0106858	-69.8202	219.023	0.524707	No
280	waterinfil	invert	10	0.08	2128.43	PCoA2soil_OTU_invert	0.00398991	178.062	205.832	0.0856042	No
281	waterinfil	invert	10	0.08	2128.43	PCoA2soil_OTU_invert	0.0106858	178.062	205.832	0.0856042	No
282	waterinfil	invert	10	0.08	2128.43	CUGICsimple10	0.00132637	8.85848	115.565	0.878356	No
283	waterinfil	invert	10	0.08	2128.43	ndviMaxScaled10	0.00621664	-128.988	201.322	0.201977	No
284	waterinfil	invert	10	0.08	2128.43	LULC102	0.0272649	76.8371	89.61	0.0883711	No
285	waterinfil	invert	10	0.08	2128.43	LULC103	0.0272649	-4.98236	71.032	0.888618	No
286	waterinfil	invert	10	0.08	2128.43	LULC104	0.0272649	-27.4328	123.241	0.656808	No
287	waterinfil	burrow	10	0.06	2131.7	(Intercept)	0.027893	550.798	284.07	0.000155678	Yes
288	waterinfil	burrow	10	0.06	2131.7	bulkDensity	0.0309013	-229.174	150.022	0.00265137	Yes
289	waterinfil	burrow	10	0.06	2131.7	soilMoisture	0.0503212	-704.896	420.69	0.00101245	Yes
290	waterinfil	burrow	10	0.06	2131.7	soilMoisture	0.00115402	-704.896	420.69	0.00101245	Yes
291	waterinfil	burrow	10	0.06	2131.7	soilMoisture	0.000240457	-704.896	420.69	0.00101245	Yes
292	waterinfil	burrow	10	0.06	2131.7	PCoA1soil_OTU_burrow	0.00115402	44.0219	175.672	0.616958	No
293	waterinfil	burrow	10	0.06	2131.7	PCoA1soil_OTU_burrow	0.000240457	44.0219	175.672	0.616958	No
294	waterinfil	burrow	10	0.06	2131.7	PCoA2soil_OTU_burrow	0.00115402	12.9392	191.388	0.892619	No
295	waterinfil	burrow	10	0.06	2131.7	PCoA2soil_OTU_burrow	0.000240457	12.9392	191.388	0.892619	No
296	waterinfil	burrow	10	0.06	2131.7	CUGICsimple10	0.00105108	-6.38653	116.361	0.912734	No
297	waterinfil	burrow	10	0.06	2131.7	ndviMaxScaled10	0.00411998	-92.6577	201.157	0.358363	No
298	waterinfil	burrow	10	0.06	2131.7	LULC102	0.027893	76.6744	91.0138	0.0940342	No
299	waterinfil	burrow	10	0.06	2131.7	LULC103	0.027893	-12.3526	71.7152	0.730947	No
300	waterinfil	burrow	10	0.06	2131.7	LULC104	0.027893	-28.8115	124.555	0.64428	No
301	waterinfil	none	20	0.06	2130.1	(Intercept)	0.0175427	463.68	312.388	0.00346391	Yes
302	waterinfil	none	20	0.06	2130.1	bulkDensity	0.0293252	-214.869	145.257	0.00357369	Yes
303	waterinfil	none	20	0.06	2130.1	soilMoisture	0.0539322	-747.407	416.664	0.000446229	Yes
304	waterinfil	none	20	0.06	2130.1	CUGICsimple20	0.000656681	-0.908814	135.076	0.989281	No
305	waterinfil	none	20	0.06	2130.1	ndviMaxScaled20	0.00119291	40.6338	218.721	0.710725	No
306	waterinfil	none	20	0.06	2130.1	LULC202	0.0175427	58.5303	91.4433	0.202394	No
307	waterinfil	none	20	0.06	2130.1	LULC203	0.0175427	24.2732	70.4964	0.492075	No
308	waterinfil	none	20	0.06	2130.1	LULC204	0.0175427	35.4667	147.073	0.630269	No
309	waterinfil	all	20	0.06	2132.59	(Intercept)	0.0174673	468.426	315.272	0.00343886	Yes
310	waterinfil	all	20	0.06	2132.59	bulkDensity	0.0250353	-206.327	155.562	0.00882266	Yes
311	waterinfil	all	20	0.06	2132.59	soilMoisture	0.0578115	-787.25	425.084	0.000295289	Yes
312	waterinfil	all	20	0.06	2132.59	soilMoisture	0.0025403	-787.25	425.084	0.000295289	Yes
313	waterinfil	all	20	0.06	2132.59	soilMoisture	0.00682598	-787.25	425.084	0.000295289	Yes
314	waterinfil	all	20	0.06	2132.59	PCoA1soil_OTU	0.0025403	17.4102	195.495	0.858868	No
315	waterinfil	all	20	0.06	2132.59	PCoA1soil_OTU	0.00682598	17.4102	195.495	0.858868	No
316	waterinfil	all	20	0.06	2132.59	PCoA2soil_OTU	0.0025403	-139.648	239.498	0.245347	No
317	waterinfil	all	20	0.06	2132.59	PCoA2soil_OTU	0.00682598	-139.648	239.498	0.245347	No
318	waterinfil	all	20	0.06	2132.59	CUGICsimple20	0.000562516	5.21989	136.368	0.939076	No
319	waterinfil	all	20	0.06	2132.59	ndviMaxScaled20	0.000658082	-5.19106	232.256	0.964403	No
320	waterinfil	all	20	0.06	2132.59	LULC202	0.0174673	65.3693	93.7265	0.165056	No
321	waterinfil	all	20	0.06	2132.59	LULC203	0.0174673	22.3511	70.7628	0.528507	No
322	waterinfil	all	20	0.06	2132.59	LULC204	0.0174673	31.4135	147.502	0.670746	No
323	waterinfil	invert	20	0.07	2131.16	(Intercept)	0.0183591	461.84	312.162	0.00357457	Yes
324	waterinfil	invert	20	0.07	2131.16	bulkDensity	0.0279953	-215.949	150.407	0.00466092	Yes
325	waterinfil	invert	20	0.07	2131.16	soilMoisture	0.0578437	-782.626	418.327	0.000257473	Yes
326	waterinfil	invert	20	0.07	2131.16	soilMoisture	0.00364997	-782.626	418.327	0.000257473	Yes
327	waterinfil	invert	20	0.07	2131.16	soilMoisture	0.00930731	-782.626	418.327	0.000257473	Yes
328	waterinfil	invert	20	0.07	2131.16	PCoA1soil_OTU_invert	0.00364997	-66.101	217.08	0.543422	No
329	waterinfil	invert	20	0.07	2131.16	PCoA1soil_OTU_invert	0.00930731	-66.101	217.08	0.543422	No
330	waterinfil	invert	20	0.07	2131.16	PCoA2soil_OTU_invert	0.00364997	160.966	206.432	0.12093	No
331	waterinfil	invert	20	0.07	2131.16	PCoA2soil_OTU_invert	0.00930731	160.966	206.432	0.12093	No
332	waterinfil	invert	20	0.07	2131.16	CUGICsimple20	0.000816047	12.2749	135.929	0.856913	No
333	waterinfil	invert	20	0.07	2131.16	ndviMaxScaled20	0.000630869	4.37522	224.922	0.969017	No
334	waterinfil	invert	20	0.07	2131.16	LULC202	0.0183591	64.0221	91.4846	0.163637	No
335	waterinfil	invert	20	0.07	2131.16	LULC203	0.0183591	26.7825	70.5793	0.449052	No
336	waterinfil	invert	20	0.07	2131.16	LULC204	0.0183591	33.0643	146.784	0.652971	No
337	waterinfil	burrow	20	0.05	2133.93	(Intercept)	0.0175239	467.663	314.872	0.00345018	Yes
338	waterinfil	burrow	20	0.05	2133.93	bulkDensity	0.029411	-223.196	151.959	0.00381626	Yes
339	waterinfil	burrow	20	0.05	2133.93	soilMoisture	0.0538648	-742.896	419.927	0.000532759	Yes
340	waterinfil	burrow	20	0.05	2133.93	soilMoisture	0.000851978	-742.896	419.927	0.000532759	Yes
341	waterinfil	burrow	20	0.05	2133.93	soilMoisture	0.000105671	-742.896	419.927	0.000532759	Yes
342	waterinfil	burrow	20	0.05	2133.93	PCoA1soil_OTU_burrow	0.000851978	34.3935	174.711	0.694333	No
343	waterinfil	burrow	20	0.05	2133.93	PCoA1soil_OTU_burrow	0.000105671	34.3935	174.711	0.694333	No
344	waterinfil	burrow	20	0.05	2133.93	PCoA2soil_OTU_burrow	0.000851978	11.3005	188.673	0.904806	No
345	waterinfil	burrow	20	0.05	2133.93	PCoA2soil_OTU_burrow	0.000105671	11.3005	188.673	0.904806	No
346	waterinfil	burrow	20	0.05	2133.93	CUGICsimple20	0.000640742	1.31241	136.652	0.9847	No
347	waterinfil	burrow	20	0.05	2133.93	ndviMaxScaled20	0.00119414	45.8026	223.029	0.68184	No
348	waterinfil	burrow	20	0.05	2133.93	LULC202	0.0175239	59.1403	92.2623	0.201768	No
349	waterinfil	burrow	20	0.05	2133.93	LULC203	0.0175239	22.9754	71.2882	0.520159	No
350	waterinfil	burrow	20	0.05	2133.93	LULC204	0.0175239	33.7967	148.209	0.648983	No
351	waterinfil	none	50	0.09	2125.12	(Intercept)	0.0440654	260.698	370.136	0.160925	No
352	waterinfil	none	50	0.09	2125.12	bulkDensity	0.0218984	-172.211	149.514	0.022565	Yes
353	waterinfil	none	50	0.09	2125.12	soilMoisture	0.0467332	-651.373	421.406	0.00235998	Yes
354	waterinfil	none	50	0.09	2125.12	CUGICsimple50	0.0086341	61.5289	158.871	0.439762	No
355	waterinfil	none	50	0.09	2125.12	ndviMaxScaled50	0.00815945	143.474	267.392	0.284865	No
356	waterinfil	none	50	0.09	2125.12	LULC502	0.0440654	87.2773	80.0996	0.0308154	Yes
357	waterinfil	none	50	0.09	2125.12	LULC503	0.0440654	54.975	76.4438	0.152348	No
358	waterinfil	none	50	0.09	2125.12	LULC504	0.0440654	124.298	233.594	0.288871	No
359	waterinfil	all	50	0.09	2127.84	(Intercept)	0.0440617	281.48	373.329	0.133618	No
360	waterinfil	all	50	0.09	2127.84	bulkDensity	0.0196726	-173.86	158.174	0.0294171	Yes
361	waterinfil	all	50	0.09	2127.84	soilMoisture	0.0503432	-697.163	430.762	0.00147971	Yes
362	waterinfil	all	50	0.09	2127.84	soilMoisture	0.00217333	-697.163	430.762	0.00147971	Yes
363	waterinfil	all	50	0.09	2127.84	soilMoisture	0.00556642	-697.163	430.762	0.00147971	Yes
364	waterinfil	all	50	0.09	2127.84	PCoA1soil_OTU	0.00217333	42.472	192.235	0.659199	No
365	waterinfil	all	50	0.09	2127.84	PCoA1soil_OTU	0.00556642	42.472	192.235	0.659199	No
366	waterinfil	all	50	0.09	2127.84	PCoA2soil_OTU	0.00217333	-111.917	230.921	0.333912	No
367	waterinfil	all	50	0.09	2127.84	PCoA2soil_OTU	0.00556642	-111.917	230.921	0.333912	No
368	waterinfil	all	50	0.09	2127.84	CUGICsimple50	0.00814589	62.8028	160.072	0.433845	No
369	waterinfil	all	50	0.09	2127.84	ndviMaxScaled50	0.00633866	104.658	279.195	0.45457	No
370	waterinfil	all	50	0.09	2127.84	LULC502	0.0440617	93.7291	81.8847	0.0234209	Yes
371	waterinfil	all	50	0.09	2127.84	LULC503	0.0440617	51.1438	77.1824	0.187044	No
372	waterinfil	all	50	0.09	2127.84	LULC504	0.0440617	122.964	234.971	0.296909	No
373	waterinfil	invert	50	0.09	2126.46	(Intercept)	0.0447814	271.104	369.749	0.144572	No
374	waterinfil	invert	50	0.09	2126.46	bulkDensity	0.0213403	-176.809	154.293	0.0232692	Yes
375	waterinfil	invert	50	0.09	2126.46	soilMoisture	0.0499831	-685.306	424.039	0.0015022	Yes
376	waterinfil	invert	50	0.09	2126.46	soilMoisture	0.00277135	-685.306	424.039	0.0015022	Yes
377	waterinfil	invert	50	0.09	2126.46	soilMoisture	0.0091672	-685.306	424.039	0.0015022	Yes
378	waterinfil	invert	50	0.09	2126.46	PCoA1soil_OTU_invert	0.00277135	-46.4233	210.259	0.659411	No
379	waterinfil	invert	50	0.09	2126.46	PCoA1soil_OTU_invert	0.0091672	-46.4233	210.259	0.659411	No
380	waterinfil	invert	50	0.09	2126.46	PCoA2soil_OTU_invert	0.00277135	153.646	202.904	0.131957	No
381	waterinfil	invert	50	0.09	2126.46	PCoA2soil_OTU_invert	0.0091672	153.646	202.904	0.131957	No
382	waterinfil	invert	50	0.09	2126.46	CUGICsimple50	0.00897266	70.5686	160.845	0.381597	No
383	waterinfil	invert	50	0.09	2126.46	ndviMaxScaled50	0.006515	106.747	271.506	0.432882	No
384	waterinfil	invert	50	0.09	2126.46	LULC502	0.0447814	90.2702	80.0808	0.0255763	Yes
385	waterinfil	invert	50	0.09	2126.46	LULC503	0.0447814	52.277	76.7098	0.174878	No
386	waterinfil	invert	50	0.09	2126.46	LULC504	0.0447814	122.316	233.217	0.295846	No
387	waterinfil	burrow	50	0.08	2128.88	(Intercept)	0.0437846	261.776	372.365	0.161733	No
388	waterinfil	burrow	50	0.08	2128.88	bulkDensity	0.0223566	-182.083	155.899	0.0207849	Yes
389	waterinfil	burrow	50	0.08	2128.88	soilMoisture	0.0463755	-644.488	424.864	0.00283477	Yes
390	waterinfil	burrow	50	0.08	2128.88	soilMoisture	0.00105773	-644.488	424.864	0.00283477	Yes
391	waterinfil	burrow	50	0.08	2128.88	soilMoisture	0.000114985	-644.488	424.864	0.00283477	Yes
392	waterinfil	burrow	50	0.08	2128.88	PCoA1soil_OTU_burrow	0.00105773	40.5762	172.811	0.639304	No
393	waterinfil	burrow	50	0.08	2128.88	PCoA1soil_OTU_burrow	0.000114985	40.5762	172.811	0.639304	No
394	waterinfil	burrow	50	0.08	2128.88	PCoA2soil_OTU_burrow	0.00105773	12.2785	181.966	0.892825	No
395	waterinfil	burrow	50	0.08	2128.88	PCoA2soil_OTU_burrow	0.000114985	12.2785	181.966	0.892825	No
396	waterinfil	burrow	50	0.08	2128.88	CUGICsimple50	0.00888576	68.2002	162.611	0.402874	No
397	waterinfil	burrow	50	0.08	2128.88	ndviMaxScaled50	0.00822077	144.422	269.677	0.285813	No
398	waterinfil	burrow	50	0.08	2128.88	LULC502	0.0437846	87.0231	80.5977	0.0323636	Yes
399	waterinfil	burrow	50	0.08	2128.88	LULC503	0.0437846	52.9843	77.4151	0.173044	No
400	waterinfil	burrow	50	0.08	2128.88	LULC504	0.0437846	122.169	235.136	0.300371	No
