# Supplementary material for: Urban green infrastructure does not show synergies or trade-offs in ecosystem services and invertebrate species richness
Source: Research Square preprint supplement (doi:10.21203/rs.3.rs-5841194/v1), 2025-06-23
Supplement: Supplementary file 6 [file f4b206b425e7982ae3cdd021.docx]

**Table 1. Description of the measured ES and controlling covariates and their statistics.**

| Variable | ES Model | Formula term | Description |
| --- | --- | --- | --- |
| Water infiltration rate | Water regulation | Response variable | A numerical response variable that describe the amount of seconds it took for 177ml (10mm) to fully infiltrate the soil. The range of values for this variable is between 12 — 1088 seconds, with an average time of 175 seconds and a standard deviation of 309 seconds. |
| Temperature | Air temperature regulation | Response variable | A numerical response variable that describe the average temperature in degree Celsius of five Temtop sensor which log the temperature every minute for an hour per sample site. The range of values for this variable is 15.4 — 40.5, with an average value of 24.5 and a standard deviation of 4.91. |
| Particulate Matter 2.5 (PM2.5) | Air pollution regulation | Response variable | A numerical response variable that describe the average Particulate Matter 2.5 of five Temtop sensor which log the data every minute for an hour per sample site. The range of values for this variable is 0.70 — 22.36, with an average value of 4.54 and a standard deviation of 4.07. |
| Invertebrate species richness | Invertebrate species richness | Response variable | A numerical response variable that describe the number of OTUs found in soil eDNA that were identified as invertebrate species. The range of values for this variable is 9 — 86, with an average value of 38 and a standard deviation of 14.9. |
| Vegetation indicators | All | Predictors of interest | Two numerical predictors and a categorical predictor reflecting the state of vegetation using remote sensing techniques, and aggregated from 10x10m to all other spatial resolutions. Briefly, vegetation density is a proportional indicator from 0 (no vegetation) — 1 (Densest vegetation). Vegetation height is a proportion indicator from 1 (vegetation <1m) — 2 (vegetation >1m). Finally, Land-use and Land-cover describe 4 categories being Natural, Residential, Park and Buffer zones. More details are in Appendix 1. |
| Soil bulk density | Water | Covariate | A numerical predictor that describe the density of the soil. It is calculated by using a constant of volume (100cc) of soil divided by the dry weight of the soil after 24h at 105°C in an oven. The range of this variable is 0.41 — 1.55 g/cm3. The average value of bulk density is 1.05 g/cm3. |
| Soil moisture | Water regulation | Covariate | A numerical predictor that describe the water content in the soil. Soil from the field was weighed and dried in an oven for 24 hours at 105°C. It is calculated by 1 minus the dry soil weight over the wet soil weight. The range of the values are 0.08% — 45.1%, with an average value of 13.1%. |
| Air temperature stationary | Air temperature regulation | Covariate | A numerical response variable that describe the average temperature in degree Celsius retrieved from a government sensor in a rural open grassland area. It logs the temperature every hour. The range of values for this variable is14.9 — 28.3, with an average value of 20.9 and a standard deviation of 2.6. |
| Air quality stationary Particulate Matter 2.5 (PM2.5) | Air pollution regulation | Covariate | A numerical predictor variable that describe the average Particulate Matter 2.5 of five Temtop sensor which log the data every minute. These sensors were stationed during the full summer on a roof in The Hague. The range of values for this variable is 0.83 — 14.49, with an average value of 3.51 and a standard deviation of 3.02. |
| Distance to road | Air quality | Covariate | A numerical predictor that describe the distance to the nearest road where cars are able to drive over 50km/h. The range of the distances is 0 — 332.8 meters, with an average value of 91.3 meter and a standard deviation of 72.8 meters. |
