# Supplementary material for: Urban green infrastructure does not show synergies or trade-offs in ecosystem services and invertebrate species richness
Source: Research Square preprint supplement (doi:10.21203/rs.3.rs-5841194/v1), 2025-06-23
Supplement: Supplementary file 7 [file f6aba5a5f5a17e5bdc69ff55.xlsx]

## Sheet: Blad1
ES	scale	rsquared	sd	avg
temperature	1	0.01	0.0172753	0.02375
temperature	2	0.04
temperature	3	0.03
temperature	4	0.01
temperature	5	0
temperature	10	0.01
temperature	20	0.04
temperature	50	0.05
AQ	1	0.01	0.0179844	0.03375
AQ	2	0.02
AQ	3	0.02
AQ	4	0.03
AQ	5	0.05
AQ	10	0.03
AQ	20	0.04
AQ	50	0.07
infiltration	1	0.08	0.0108972	0.0675
infiltration	2	0.06
infiltration	3	0.06
infiltration	4	0.06
infiltration	5	0.06
infiltration	10	0.07
infiltration	20	0.06
infiltration	50	0.09
richness	1	0.08	0.0233184	0.0975
richness	2	0.11
richness	3	0.12
richness	4	0.11
richness	5	0.1
richness	10	0.13
richness	20	0.07
richness	50	0.06
