# Supplementary material for: Urban green infrastructure does not show synergies or trade-offs in ecosystem services and invertebrate species richness
Source: Research Square preprint supplement (doi:10.21203/rs.3.rs-5841194/v1), 2025-06-23
Supplement: Supplementary file 8 [file f6ba444197b4adf4d667b03b.docx]

**Table X. Description of the vegetation indicators used in the models and their method of aggregation.** Aggregation methods describe either a mean (Bilinear), a sum method or the most frequent value (modal).

| **Variable** | **Description at 10m2** | **Aggregation method** | **20m2** | **30m2** | **40m2** | **50m2** | **100m2** | **200m2** | **500m2** |
| --- | --- | --- | --- | --- | --- | --- | --- | --- | --- |
| Vegetation density | A numerical variable that uses the average normalized difference vegetation index (NDVI), retrieved from Sentinel-2 on June — September 2022, and scaled accordingly to both the NDVI values found in our sample sites (NVDI: Min = 0.05; Max = 0.90). The range of scaled vegetation densities was 0.01 — 0.76, with an average value of 0.38 and a SD of 0.20. | Bilinear | Min=0.03  Avg=0.38  SD=0.19  Max=0.73 | Min=0.02  Avg=0.38  SD=0.19  Max=0.73 | Min=0.03  Avg=0.38  SD=0.18  Max=0.72 | Min=0.03  Avg=0.36  SD=0.18  Max=0.70 | Min=0.03  Avg=0.36  SD=0.17  Max=0.69 | Min=0.09  Avg=0.35  SD=0.15  Max=0.68 | Min=0.10  Avg=0.34  SD=0.13  Max=0.62 |
| Vegetation height | A binary variable that uses Vegetation density in combination with AHN4 LiDAR data to classify vegetation below 1m (1) or vegetation with over 10% above 1m (2) (AHN, 2024). Upon aggregation, cells were averaged to create an indicator on vegetation structure, between 0 and 1. The minimum (indicating all vegetation <1m) and maximum values (all vegetation above >1m) were 1 and 2, respectively. The average value was 1.4 and SD 0.41. | Bilinear | Min=1  Avg=1.37  SD=0.33  Max=2 | Min=1  Avg=1.36  SD=0.31  Max=2 | Min=1  Avg=1.39  SD=0.29  Max=2 | Min=1  Avg=1.39  SD=0.26  Max=2 | Min=1  Avg=1.38  SD=0.22  Max=2 | Min=1  Avg=1.39  SD=0.19  Max=1.97 | Min=1  Avg=1.39  SD=0.17  Max=1.79 |
| LULC (land-use/landcover | A categorical variable with four classes that describe the respective classes in the CUGIC classification (Morpurgo et al., 2023). The classes are Park (n = 39), Natural (n = 17), Residential (n = 81) and Buffer zone (n = 30). | Modal | Park=39  Nat=18  Resi=86  Buff=24 | Park=41  Nat=18  Resi=88  Buff=20 | Park=40  Nat=17  Resi=89  Buff=21 | Park=45  Nat=17  Resi=91  Buff=16 | Park=41  Nat=18  Resi=100  Buff=8 | Park=43  Nat=17  Resi=101  Buff=6 | Park=45  Nat=24  Resi=96  Buff=2 |
